# Photosynthesis in *Chromera velia* Represents a Simple System with High Efficiency

Antonietta Quigg<sup>1,2\*</sup>, Eva Kotabová<sup>3,4</sup>, Jana Jarešová<sup>3,4</sup>, Radek Kaňa<sup>3,4</sup>, Jiří Šetlík<sup>3</sup>, Barbora Šedivá<sup>3</sup>, Ondřej Komárek<sup>3</sup>, Ondřej Prášil<sup>3,4</sup>

**1** Department of Marine Biology, Texas A&M University at Galveston, Galveston, Texas, United States of America, **2** Department of Oceanography, Texas A&M University, College Station, Texas, United States of America, **3** Institute of Microbiology, Academy of Sciences of the Czech Republic, Třeboň, Czech Republic, **4** Faculty of Sciences, University of South Bohemia, České Budějovice, Czech Republic

## Abstract

*Chromera velia* (Alveolata) is a close relative to apicomplexan parasites with a functional photosynthetic plastid. Even though *C. velia* has a primitive complement of pigments (lacks chlorophyll *c*) and uses an ancient type II form of RuBISCO, we found that its photosynthesis is very efficient with the ability to acclimate to a wide range of irradiances. *C. velia* maintain similar maximal photosynthetic rates when grown under continual light-limited (low light) or light-saturated (high light) conditions. This flexible acclimation to continuous light is provided by an increase of the chlorophyll content and photosystem II connectivity under light limited conditions and by an increase in the content of protective carotenoids together with stimulation of effective non-photochemical quenching under high light. *C. velia* is able to significantly increase photosynthetic rates when grown under a light-dark cycle with sinusoidal changes in light intensity. Photosynthetic activities were nonlinearly related to light intensity, with maximum performance measured at mid-morning. *C. velia* efficiently acclimates to changing irradiance by stimulation of photorespiration and non-photochemical quenching, thus avoiding any measurable photoinhibition. We suggest that the very high CO<sub>2</sub> assimilation rates under sinusoidal light regime are allowed by activation of the oxygen consuming process (possibly chlororespiration) that maintains high efficiency of RuBISCO (type II). Despite the overall simplicity of the *C. velia* photosynthetic system, it operates with great efficiency.

**Citation:** Quigg A, Kotabová E, Jarešová J, Kaňa R, Šetlík J, et al. (2012) Photosynthesis in *Chromera velia* Represents a Simple System with High Efficiency. PLoS ONE 7(10): e47036. doi:10.1371/journal.pone.0047036

**Editor:** Senjie Lin, University of Connecticut, United States of America

**Received:** May 21, 2012; **Accepted:** September 10, 2012; **Published:** October 10, 2012

**Copyright:** © 2012 Quigg et al. This is an open-access article distributed under the terms of the Creative Commons Attribution License, which permits unrestricted use, distribution, and reproduction in any medium, provided the original author and source are credited.

**Funding:** This research has been supported by the Grant Agency of the Czech Academy of Sciences, grant GAAV IAA601410907 and by Grant Agency of the Czech Republic, grant GACR P501/12/G055. International Research Travel Awards from Texas A&M Universities International programs office to A.Q. supported several visits to the Institute of Microbiology in Třeboň, Czech Republic where the work was conducted. The Institute of Microbiology is funded by the Czech Academy of Sciences (contract RVO 61388971). The funders had no role in study design, data collection and analysis, decision to publish, or preparation of the manuscript.

**Competing Interests:** The authors have declared that no competing interests exist.

\* E-mail: quigga@tamug.edu

These authors contributed equally to this work.

## Introduction

Most of all the diverse assemblage of eukaryotic oxygenic photosynthetic autotrophs present today belong to either the green (chlorophyll *b*-containing) or red (chlorophyll *c*-containing) plastid lineages [1,2,3]. There is however a subgroup of non-photosynthetic relatives, thought to have lost their plastids secondarily. The apicomplexans, which are non-photosynthetic sporozoan parasites (e.g., the malaria organism, *Plasmodium falciparum*), have a relic unpigmented plastid (apicoplast) indicating that the ancestors of these organisms were once photosynthetic, and that part of the plastid metabolic machinery is indispensable to the present organism. This may include the fatty acid synthesis enzymes [4] and isoprenoid biosynthesis [5]. Recently, two distinct families were described - *Chromeraceae* and *Vitrellaceae* [6] which include *Chromera velia* and *Vitrella brassicaformis* respectively. While apicomplexans are not currently placed in the polyphyletic group 'algae' by taxonomists, their algal roots have been long acknowledged [7,8,9].

*C. velia* (Chromerida, Alveolata) associated with the scleractinian coral *Leptastrea purpurea* was isolated in 2001 by Moore et al. [10] from Sydney Harbour (Australia). This is the first extant relative of apicomplexan parasites discovered to have a heritable functional photosynthetic plastid. *C. velia* plastid shares an origin with the apicoplasts, is surrounded by four membranes, pigmented with chlorophyll (chl) *a* and various carotenoids. Gene phylogenies relate the apicoplasts to the chloroplasts of peridinin-containing dinoflagellates [3,11,12]. Yet, *C. velia* plastids differ from those in dinoflagellates: they lack the accessory pigment chl *c* [10] and operate modified heterotrophic heme synthesis pathway [13]. It has been suggested that the ancestor of peridinin dinoflagellates and apicomplexans possessed a photosynthetic chromalveolate plastid containing chl *a* and *c* [7,8]. Other dinoflagellates, in a series of complex events not discussed herein [see 7,11,12], now have fucoxanthin-containing plastids or green plastids, and up to 50% of others lost (and did not replace) their chromalveolate plastid resulting in heterotrophy [7,8]. Nonetheless, many dinoflagellates today can still switch between autotrophy, mixotrophy and heterotrophy depending on environmental conditions.

Zooxanthellae, a group of symbiotic dinoflagellates, have important relationships with corals and other invertebrates [14,15,16,17]. Like many zooxanthellae, *C. velia* can live independently from its host and is culturable. With the discovery of *C. velia*, we now have a model organism to study apicomplexan evolution and zooxanthellae photosynthesis.

There has been a flurry of publications since the pivotal paper of Moore et al. [10] announcing the discovery of this unique phototroph. Keeling [9], Oborník et al. [18] and Janoušek et al. [19] have re-evaluated and revised current views on plastid distribution in the red lineage with *C. velia* now providing an important “missing link”. Keeling [9] reported that the appearance of *Chromera* has, along with other cryptic plastids, provided important support for the chromalveolate hypothesis proposed by Cavalier-Smith some 10 years earlier (see 7) and more importantly, transformed the view of plastid distribution in the red lineage. Janoušek et al. [19] conducted a careful phylogenetic analysis of plastid genomes to find extant plastids of apicomplexans and dinoflagellates were inherited by linear descent from a common red algal endosymbiont. It appears that plastids of heterokont algae and apicomplexa all derive from the same endosymbiosis. Okamoto and McFadden [20] concluded that the discovery of *C. velia* ends the debate on the origin of apicoplasts, providing strong evidence for origins with a red algal endosymbiont. Oborník et al. [18] instead focused on the pathway by which apicomplexa evolved from free-living heterotrophs through phototrophs to being the omnipresent obligatory intracellular parasite. More recently, Oborník et al. [6,21] presented a careful examination of the morphology and ultra structure of multiple life cycle stages; Weatherby et al. [22] provide details of the cell surface and flagella morphology of the motile form of *C. velia*; Sutak et al. [23] provide details of a nonreductive iron uptake mechanism while Guo et al. [24] reported that both nutrient concentrations and salinity are important in regulating the transformation of immotile-motile *C. velia*. Kořený et al. [13] found that unlike other eukaryotic phototrophs, *C. velia* synthesizes chl from glycine and succinyl-CoA, Kotabová et al. [25] found that fast de-epoxidation of violaxanthin in *C. velia* enables highly efficient non-photochemical fluorescence quenching (NPQ) and Pan et al. [26] published a detailed phylogenetic analysis of the light-harvesting antennae of *C. velia*. Recently, Botté et al. [27] identified plant-like galactolipids and Leblond et al. [28] determined sterols in a *Chromera*. Given the potential for *C. velia* in the screening of anti-apicoplast drugs for the treatment of malaria (*Plasmodium* sp.) and diseases caused by related parasites (e.g., *Toxoplasma*), Okamoto and McFadden [20] concluded that “the little alga from the bottom of Sydney Harbour” may eventually be enlisted in developing new treatments for these diseases using herbicides which will attack the photosynthetic apparatus.

However, to date, there is no information on the properties and efficiency of photosynthesis in *C. velia* which displays simple pigmentation (only chl *a* together with violaxanthin,  $\beta$ , $\beta$ -carotene and a novel isofucoanthin-like carotenoid but without any accessory pigments like chl *c* [10]) and utilizes the primitive form (type II) of RuBisCO [19]. Herein, we investigated photosynthesis in *C. velia* in detail (electron transport and O<sub>2</sub> evolution in Photosystem (PS) II, <sup>14</sup>C fixation rates in Calvin-Benson cycle, pigment composition) together with its ability for photoacclimation to both continuous “low” and “high” light (15 and 200  $\mu\text{mol photons m}^{-2} \text{s}^{-1}$ ) as well as its response to “natural” changes in irradiance provided with a sinusoidal light:dark regime. We found that photosynthesis in *C. velia* represents a simple system with surprisingly high efficiency. *C. velia* protects itself against photo-inhibition at high irradiance by utilizing NPQ, energy spillover

and photorespiration. At low irradiances *C. velia* maximizes its performance by reorganizing its antennae to ensure a constant light-dependent rate of photosynthesis across all growth environments.

## Methods

### Organism and culture conditions

*C. velia* (strain RM12) was maintained in f/2 culture medium and 28°C. For low light (LL) and high light (HL) experiments, cells were kept in semi-continuous batch growth with 24 h continuous light of 15 and 200  $\mu\text{mol photons m}^{-2} \text{s}^{-1}$  respectively. For the sinusoidal light:dark cycle experiments, cells were grown under a 12:12 h light:dark cycle. Light intensity was controlled by computer [29] with a midday peak of 500  $\mu\text{mol photons m}^{-2} \text{s}^{-1}$  (dashed curves e.g. in Fig. 1). Nutrient concentrations were saturating, pH buffered at 8.2, bubbling ensured CO<sub>2</sub> supply and mixing. Cells were counted daily and size determined with a calibrated Coulter Counter (Beckman Multisizer III) equipped with a 70  $\mu\text{m}$  aperture; cell densities were maintained between  $1.0\text{--}2.0 \times 10^6$  cells  $\text{ml}^{-1}$  by periodic dilutions with fresh f/2 medium. Specific growth rates ( $\mu$ ;  $\text{day}^{-1}$ ) were determined from  $\mu = (\ln c - \ln c_0)/(t - t_0)$  where *c* is the cell concentration and *t* is measured in days once cells had acclimated to the respective light treatment.

### Cell composition

Cultures ( $n \geq 3$ ) were harvested onto precombusted (400°C, 4 hrs) GF/F filters and frozen until analysis of cellular carbon and nitrogen. Samples for pigment extractions were, in the same way as for fluorescence measurements, dark acclimated for 20 min prior to collection on GF/F filters and frozen immediately. Thawed filters were soaked in 100% methanol at  $-20^\circ\text{C}$  and subsequently disrupted using a mechanical tissue grinder. Centrifugation (12000 g, 15 min) immediately before HPLC analysis on an Agilent 1200 chromatography system equipped with the DAD detector removed debris. Pigments were separated using a Phenomenex column (Luna 3 $\mu$  C8, size 100 $\times$ 4.60 mm) at 35°C by applying a 0.028 M ammonium acetate/MeOH gradient (20/80) with a flow rate of 0.8 ml/min [30]. Eluted pigments were quantified by their absorption at 440 nm with consideration of their different extinction coefficients. For chl quantification, we used the same extract, but measured the sample on a UV/VIS spectrophotometer (Unicam UV 550, Thermo Spectronic, UK). Chl *a* concentration was calculated according to et al. [31].

### Fluorescence emission spectra

Room temperature fluorescence emission spectra were measured in cuvette with a SM-9000 spectrophotometer (Photon Systems Instruments, Czech Republic) for blue light excitation ( $\lambda = 464$  nm) with a dark acclimated sample in the  $F_m$  (maximum fluorescence) state induced by a saturating pulse according to Kaňa et al. [32]. 77 K Chl fluorescence emission spectra were measured using the Aminco Bowman series 2 spectrofluorometer (Thermo Fisher Scientific, USA). The excitation was at 435 nm and 4 nm slit width. The emission spectra were recorded in 0.4 nm steps from 600 to 800 nm, with 1 nm slit width. The instrument function was corrected by dividing raw emission spectra by simultaneously recorded signal from the reference diode. Spectra were normalized to 690 nm. Fluorescence nomenclature is summarized in Table 1.

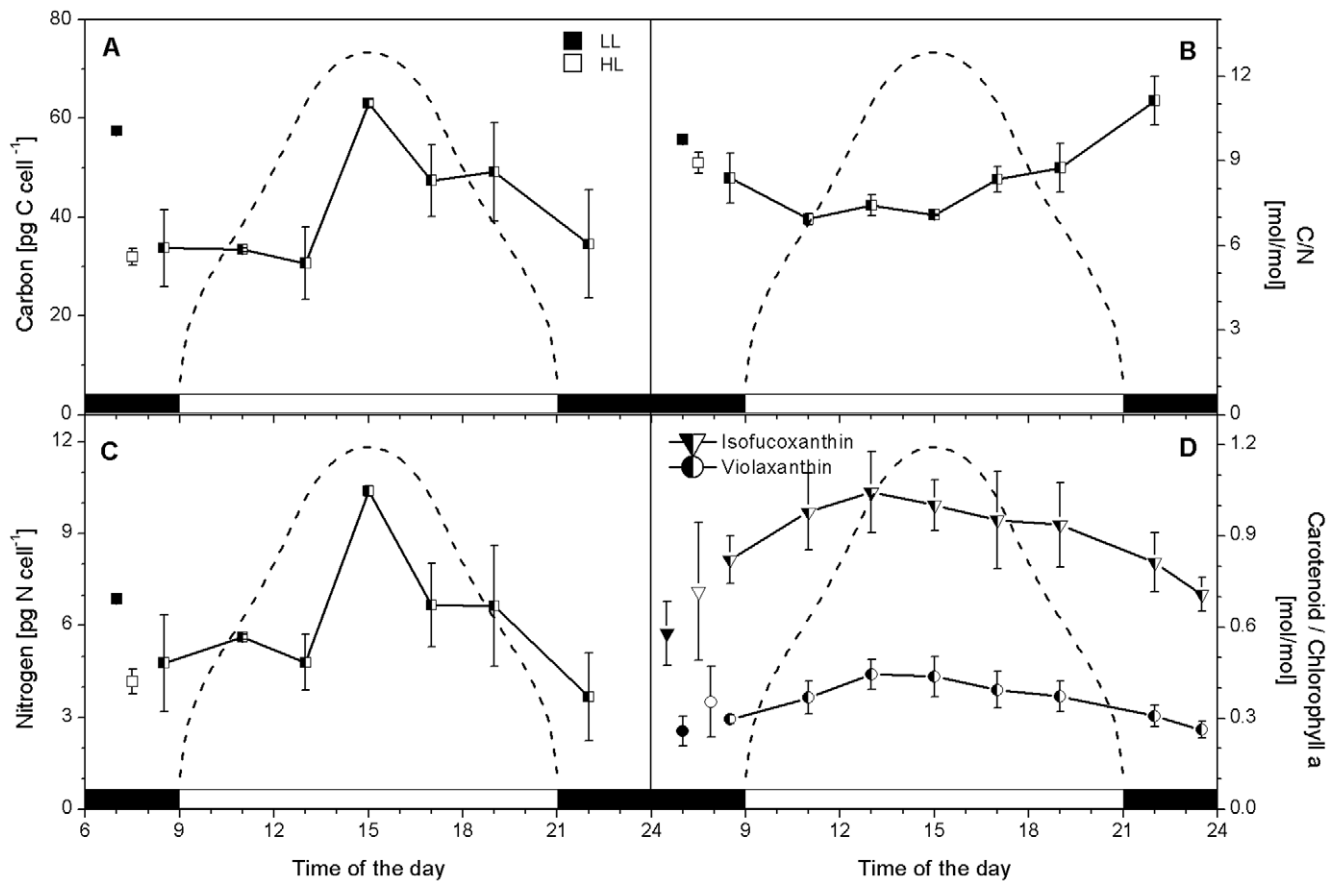

**Figure 1. Changes in *C. velia* C, N, C:N and carotenoids during a sinusoidal light:dark cycle.** Changes in C (pg C cell<sup>-1</sup>, panel A), the ratio of C:N (mol:mol, panel B), N quotas (pg N cell<sup>-1</sup>, panel C) and the major carotenoids relative to chl *a* (presented as ratio per chl *a*, panel D) are shown. Error bars are calculated as standard deviations of n ≥ 3 replicated. Average values (plus error bars) measured for LL (■) and HL (□) grown *C. velia* are included for comparison. The dashed line shows the light intensity during the light part of the cycle, with a midday peak of 500  $\mu\text{mol photons m}^{-2} \text{s}^{-1}$ .

doi:10.1371/journal.pone.0047036.g001

### Variable fluorescence measurements

Chlorophyll fluorescence was measured using a double-modulation fluorometer FL-3000 (Photon System Instruments, Czech Republic). Before measurements started, cells were dark acclimated for 20 min to oxidize the electron transport chain. A multiple turnover saturating flash was applied to measure the maximum quantum yield of photochemistry of PS II ( $F_v/F_m$ ) according to  $(F_m - F_o)/F_m$  where the difference between the maximum ( $F_m$ ) and minimal fluorescence ( $F_o$ ) is used to calculate the variable fluorescence ( $F_v$ ) [33]. Cells were then illuminated with an orange actinic light (625 nm; 480  $\mu\text{mol photons m}^{-2} \text{s}^{-1}$ ). After 2 min, another saturating flash was applied and NPQ calculated as  $(F_m - F_m')/F_m'$  in which case  $F_m'$  is the maximum fluorescence measured in the light. Photochemical quenching (qP) was calculated as  $(F_m' - F_i)/(F_m' - F_o')$ . The effective quantum yield of PSII photochemistry (Genty's parameter,  $\Phi_{PSII}$ ) was calculated as  $(F_m' - F_i)/F_m'$ , where  $F_i$  was the actual fluorescence level at given time excited by the actinic light.

Fast rate repetition fluorescence was measured using specially designed FM 3500 fluorometer (Photon Systems Instruments, Czech Republic). After 20 min dark acclimation, a series of 100 blue (463 nm) single turnover (1  $\mu\text{s}$ ) saturating flashes for sequential PSII closure were applied. This was done for eleven levels of blue (463 nm) actinic light intensities (0–1650  $\mu\text{mol photons m}^{-2} \text{s}^{-1}$ ). The data were fitted to model of Kolber et al. [33]

including parameters such as maximum and minimal fluorescence, effective PSII cross-section ( $\sigma_{PSII}$ ) and connectivity ( $\beta$ ). These parameters were used for calculation of the electron transport rate  $ETR_{PSII}$  as  $\sigma_{PSII} (F_q'/F_v')/(F_v'/F_m) E$ , where  $F_q'$  is  $(F_m' - F')$  and  $E$  (light intensity) according to Suggett et al. [34]. The specific absorption of PSII ( $a^*_{PSII}$ ) was calculated as  $(\sigma_{PSII} (RC_{PSII}/chl a))/(F_v'/F_m')$ , where  $RC_{PSII}/chl a$  is equal to 0.002 [34].

### Gas exchange measurements

Photosynthesis and dark respiration rates at 28°C were measured using a Clark-type oxygen electrode (Theta 90, Czech Republic) in the presence of 1 mM sodium bicarbonate. Light intensity in the electrode chamber was measured using a calibrated microspherical quantum sensor US-SQS/A (Walz, Germany) and light meter LI-250 (Li-Cor, USA). Gross photosynthesis ( $A_g$ ) was calculated from the slope of  $O_2$  evolution at a saturating irradiance plus the slope of respiratory  $O_2$  utilization measured in the dark after the light exposure.  $O_2$  evolution rates were normalized to chl *a*.

### <sup>14</sup>C fixation

The relationship between photosynthesis and irradiance was determined using the small volume <sup>14</sup>C incubation method of Lewis and Smith [35]. Cultures were kept in the dark for 20 mins before starting by spiking an aliquot (25 ml) of culture with <sup>14</sup>C-

**Table 1.** Abbreviations, equations and units.

|                           |                                                                                          |                                                                 |
|---------------------------|------------------------------------------------------------------------------------------|-----------------------------------------------------------------|
| $\alpha$                  | photosynthetic efficiency; measured from the initial slope of a PI curve                 | mgC mg chl $a^{-1} s^{-1}/\mu\text{mol photons } m^{-2} s^{-1}$ |
| $a^*_{PSII}$              | chl a-specific PSII absorption coefficient                                               | $m^2 [\text{mg chl } a]^{-1}$                                   |
| Ag                        | gross photosynthetic rate                                                                | $\mu\text{mol O}_2 \text{ mg chl } a^{-1} h^{-1}$               |
| c                         | cell concentration                                                                       | cells $mL^{-1}$                                                 |
| Chl a                     | chlorophyll a                                                                            | pg $cell^{-1}$                                                  |
| $E_k$                     | index of light saturation = $P_m/\alpha$                                                 | $\mu\text{mol } m^{-2} s^{-1}$                                  |
| $ETR_{PSII}$              | Electron transport rate                                                                  | $\mu\text{mol electrons mg chl } a^{-1} h^{-1}$                 |
| $F_o$ and $F_o'$          | minimal fluorescence yield in the dark and in the light respectively                     | relative units                                                  |
| $F_m$ and $F_m'$          | maximum fluorescence yield in the dark and in the light respectively                     | relative units                                                  |
| $F_v$                     | variable fluorescence yield = $F_m - F_o$                                                | relative units                                                  |
| $F_v/F_m$                 | maximum quantum yield of photochemistry = $(F_m - F_o)/F_m$                              | relative units                                                  |
| $F_q$                     | Difference between fluorescence yields = $F_m' - F_t$                                    | relative units                                                  |
| $F_t$                     | actual fluorescence level at a given time excited by the actinic light                   | relative units                                                  |
| $\Phi_{PSII}$             | effective quantum yield of PSII photochemistry (Genty's parameter) = $(F_m' - F_t)/F_m'$ | relative units                                                  |
| HL                        | high light                                                                               |                                                                 |
| LL                        | low light                                                                                |                                                                 |
| n                         | number of replicates performed for a given experiment                                    |                                                                 |
| NPQ                       | non-photochemical quenching = $(F_m - F_m')/F_m'$                                        | relative units                                                  |
| p                         | Connectivity factor                                                                      |                                                                 |
| $P_{max}$                 | maximum chl-specific carbon fixation rate                                                | mgC mg chl $a^{-1} h^{-1}$                                      |
| PS I                      | photosystem one                                                                          |                                                                 |
| PS II                     | photosystem two                                                                          |                                                                 |
| PQ                        | Photosynthetic quotient                                                                  |                                                                 |
| PTOX                      | plastid-localized terminal oxidase enzyme                                                |                                                                 |
| qP                        | photochemical quenching                                                                  | relative units                                                  |
| $RC_{PSII}/\text{Chl } a$ | photosynthetic unit size                                                                 | $m^2 (\text{mol Chl } a)^{-1}$                                  |
| $\sigma_{PSII}$           | effective absorption cross section of PSII under dark acclimation                        | $A^2 \text{ PSII}$                                              |
| t                         | time                                                                                     | day                                                             |
| $\mu$                     | specific growth rate = $(\ln c - \ln c_0)/(t - t_0)$                                     | $day^{-1}$                                                      |

doi:10.1371/journal.pone.0047036.t001

sodium bicarbonate (MP Biochemicals, USA; final concentration of  $1 \mu\text{Ci } ml^{-1}$ ) and incubating for 40 mins at  $28^\circ\text{C}$  and a range of light intensities from 5 to  $1500 \mu\text{mol photons } m^{-2} s^{-1}$ . Triplicate samples for background counts (with  $100 \mu\text{L}$  of buffered formalin) and total counts (with  $250 \mu\text{L}$  of phenethylamine and 5 ml of Ecolume scintillation cocktail) were prepared at the start. Buffered formalin ( $100 \mu\text{L}$ ) terminated the reactions; samples were acidified with 50% HCl (1 mL) were left overnight to purge off unincorporated label before disintegrations per minute were counted on a calibrated Tricarb 1500 Scintillation Counter. Dissolved inorganic carbon concentrations were determined in a cell-free medium by the Gran titration technique described by Butler [36]. Photosynthesis-irradiance curves were fitted using  $P = P_{max} \times \tanh(\alpha \times E/P_{max})$  according to Jassby and Platt [37] where the maximum chl-specific carbon fixation rate ( $P_{max} = \text{mg C mg chl}^{-1} h^{-1}$ ) and the initial slope of the curve ( $\alpha = \text{mg C mg chl}^{-1} h^{-1} (\mu\text{mole photons } m^{-2} s^{-1})^{-1}$ ) were estimated from measurements of photosynthesis (P) and irradiance (E). The index of light saturation ( $E_k; \mu\text{mol } m^{-2} s^{-1}$ ) was calculated as  $P_{max}/\alpha$ .

## Results

All findings are presented as averages of  $n \geq 3$  cultures plus/minus standard deviations.

## Basic physiological parameters

Growth rates were determined once cultures of *C. velia* had acclimated to the respective irradiance (Table 2). While LL cells grew faster ( $0.21 \pm 0.02 \text{ day}^{-1}$ ) than those at HL ( $0.16 \pm 0.01 \text{ day}^{-1}$ ), cells growing on the sinusoidal light:dark cycle had the fastest overall growth rate of  $0.37 \pm 0.01 \text{ day}^{-1}$ . Cell size was dependent on the light intensity for growth and light regime (Table 2), *C. velia* cell diameter decreased in the following order: LL ( $6.87 \pm 0.09 \mu\text{m}$ ), sinusoidal cycle ( $6.07 \pm 0.63 \mu\text{m}$ ) and HL ( $5.68 \pm 0.31 \mu\text{m}$ ).

Cellular C and N concentrations for *C. velia* were dependent of the irradiance for growth as well as the time of day (Table 2; Fig. 1A, B, C). The average cellular C quota was significantly higher in LL ( $57 \text{ pg C cell}^{-1} \pm 1$ ) than in HL ( $32 \text{ pg C cell}^{-1} \pm 2$ ) ( $p = 0.002$ ;  $n = 2$ ) cells but this was not the case for N quotas ( $6.88 \text{ pg N cell}^{-1} \pm 0.14$  and  $4.18 \text{ pg N cell}^{-1} \pm 0.40$  respectively,  $p = 0.093$ ;  $n = 2$ ). However, given the different cell sizes, the average cellular densities of C and N were almost identical for both treatments ( $0.33\text{--}0.34 \text{ pg C } \mu\text{m}^{-3}$  and  $0.041\text{--}0.044 \text{ pg N } \mu\text{m}^{-3}$ , respectively). In the sinusoidal grown *C. velia* (Fig. 1A, C), C quotas increased throughout the light period from predawn values of  $34 \text{ pg C cell}^{-1} (\pm 8)$  to  $63 \text{ pg C cell}^{-1} (\pm 1)$  in the middle of the day corresponding to a 85% increase (paralleled by a 116%

**Table 2.** Summary of cellular responses in *C. velia* grown under three different photon treatments.

|                                                                  | LL                  | HL                  | Sinusoidal light:dark cycle | Response in sinusoidal cultures |
|------------------------------------------------------------------|---------------------|---------------------|-----------------------------|---------------------------------|
| Irradiance $\mu\text{mol photons m}^{-2} \text{ s}^{-1}$         | 15                  | 200                 | Max. 500                    | Sinusoidal function             |
| Irradiance regime                                                | 24 h continuous     | 24 h continuous     | 12 h:12 h light:dark        |                                 |
| Photon dose per day mol photons $\text{m}^{-2} \text{ day}^{-1}$ | 1.3                 | 17.3                | 13.2                        |                                 |
| Growth rate $\text{d}^{-1}$                                      | $0.21 \pm 0.02$     | $0.16 \pm 0.01$     | $0.37 \pm 0.01$             |                                 |
| Cell size $\mu\text{m}$                                          | $6.87 \pm 0.09$     | $5.68 \pm 0.31$     | $6.07 \pm 0.63$             | no change                       |
| C quota pg cell <sup>-1</sup>                                    | $57 \pm 1$          | $32 \pm 2$          | $53 \pm 12$                 | See Fig. 1A                     |
| C:N mol:mol                                                      | $9.8 \pm 0.1$       | $8.9 \pm 0.4$       | $8.4 \pm 0.7$               | See Fig. 1B                     |
| N quota pg cell <sup>-1</sup>                                    | $6.88 \pm 0.14$     | $4.18 \pm 0.40$     | $6.4 \pm 1.7$               | See Fig. 1C                     |
| Chl <i>a</i> pg cell <sup>-1</sup>                               | $0.60 \pm 0.08$     | $0.21 \pm 0.05$     | $0.45 \pm 0.04$             | no change                       |
| violaxanthin/Chl <i>a</i> mol:mol                                | $0.26 \pm 0.05$     | $0.35 \pm 0.12$     | $0.36 \pm 0.07$             | See Fig. 1D                     |
| isofucoaxanthin/Chl <i>a</i> mol:mol                             | $0.58 \pm 0.11$     | $0.72 \pm 0.23$     | $0.91 \pm 0.11$             | See Fig. 1D                     |
| $\beta, \beta$ -carotene/Chl <i>a</i> mol:mol                    | $0.030 \pm 0.006$   | $0.034 \pm 0.009$   | $0.045 \pm 0.007$           | no change                       |
| total carotenoids/Chl <i>a</i> mol:mol                           | $0.87 \pm 0.15$     | $1.11 \pm 0.31$     | $1.31 \pm 0.18$             | See Fig. 1D                     |
| Chl <i>a</i> specific absorption of PSII a*PSII                  | $0.0071 \pm 0.0002$ | $0.0101 \pm 0.0003$ | $0.0109 \pm 0.0003$         | Not shown                       |

doi:10.1371/journal.pone.0047036.t002

increase in N quotas). Within an hour of lights off, C and N quotas were back down to predawn levels. The average cellular density of C was comparable to LL and HL cultures ( $0.36 \text{ pg C } \mu\text{m}^{-3}$ ) but the cellular density of N was higher ( $0.052 \text{ pg N } \mu\text{m}^{-3}$ ) in the sinusoidal cultures. Molar C:N ratios changed throughout the light photoperiod (Fig. 1B).

### Pigment composition

Chl *a* concentrations responded to the irradiance for growth (Table 2). In *C. velia*, cellular chl *a* concentrations were three times higher in LL cells compared to those growing at HL ( $0.60 \pm 0.08 \text{ pg chl } a \text{ cell}^{-1}$  and  $0.21 \pm 0.05 \text{ pg chl } a \text{ cell}^{-1}$  respectively). Chl *a* concentrations did not vary significantly ( $p = 0.236$ ;  $n = 21$ ) throughout the sinusoidal light:dark cycle ( $0.45 \pm 0.04 \text{ pg chl } a \text{ cell}^{-1}$ ). Despite growing at very different irradiances, the cellular density of pigments was comparable for LL ( $3.5 \text{ fg chl } a \text{ } \mu\text{m}^{-3}$ ) and sinusoidal grown *C. velia* ( $3.8 \text{ fg chl } a \text{ } \mu\text{m}^{-3}$ ) but were the lowest when cells were grown at HL ( $2.2 \text{ fg chl } a \text{ } \mu\text{m}^{-3}$ ).

Unlike its closest extant photosynthetic relatives, *C. velia* lacks chl *c* and only expresses a limited set of carotenoids [10]. Changes in the fraction of violaxanthin, isofucoaxanthin,  $\beta, \beta$ -carotene and total carotenoids were examined relative to chl *a* (Table 2). In HL relative to LL grown cells, there was in total, 28% more carotenoids ( $1.11 \pm 0.31$  and  $0.87 \pm 0.15$  respectively), specifically 35% more violaxanthin ( $0.35 \pm 0.12$  versus  $0.26 \pm 0.05$  respectively) and 24% more isofucoaxanthin ( $0.72 \pm 0.23$  versus  $0.58 \pm 0.11$  respectively).  $\beta, \beta$ -carotene was a minor component of the accessory pigment pool, and did not change significantly between HL and LL grown *C. velia* ( $0.034 \pm 0.009$  and  $0.030 \pm 0.006$  respectively;  $p = 0.237$ ;  $n = 3$ ). In *C. velia* cells growing on a sinusoidal regime, predawn total carotenoids: chl *a* ratios were similar to those of HL grown cells ( $1.17 \pm 0.09$ ), increasing to 1.55 ( $\pm 0.17$ ) before noon, then decreasing to 1.00 ( $\pm 0.07$ ) several hours post illumination (Fig. 1D).  $\beta, \beta$ -carotene also changed significantly ( $p < 0.001$ ;  $n = 23$ ) throughout the sinusoidal cycle (not shown), following a similar trend to total carotenoids. At midday, there was 47% more violaxanthin and 22% more isofucoaxanthin present in *C. velia* than before dawn. Ratios of accessory pigments to chl *a* at midday were similar, albeit higher, than those measured

in HL growing *C. velia*. When translated to cellular densities, then the density of violaxanthin was similar in LL and HL cells ( $1.22$  and  $1.15 \text{ fg } \mu\text{m}^{-3}$ , respectively, while it almost doubled in the sinusoidal cells ( $2.54 \text{ fg } \mu\text{m}^{-3}$ ). The cellular density of light harvesting isofucoaxanthin was also the highest in the sinusoidal grown cells ( $5.8 \text{ fg } \mu\text{m}^{-3}$ ), than in LL cells ( $3.08 \text{ fg } \mu\text{m}^{-3}$ ) and HL cells ( $2.36 \text{ fg } \mu\text{m}^{-3}$ ).

### Rearrangement of light harvesting complexes

The changes in arrangement of light harvesting complexes during acclimation to HL and LL were deduced from fluorescence emission spectroscopy. Spectra were measured at room and at low (77 K) temperatures. The room temperature (RT) fluorescence emission spectra of *C. velia* detected a clear red-shift of the PSII maximum between HL and LL grown *C. velia* (from 685 nm for HL to 688 nm for LL, Fig. 2A). As changes in intensities of both emission bands observed at RT (685 nm and 688 nm) showed similar kinetics during fluorescence induction with continuous light (data not shown), we attribute them to the fluorescence emission of PSII core proteins. In LL grown *C. velia*, an additional red-shifted fluorescence band at 710 nm can be seen at RT (Fig. 2A). Since PSI is not known to emit at RT and the intensity of the 710 nm fluorescence band at RT showed similar variability as the PSII emission band at 685 nm (data not shown), this indicates its origin in some red-shifted antennae of PSII.

At 77 K, a major emission band with maximum at 690 nm was observed (Fig. 2B). Under LL conditions, an additional red-shifted emission maximum at 77 K was observed as a shoulder at 712 nm (Fig. 2B). These results indicate that acclimation to different light intensities induces antennae reorganization. Since there is no distinct band that can be attributed to PSI fluorescence in the 77 K emission spectra, we cannot determine whether light acclimation also affected the stoichiometry of PSI and II. The emission spectra of cells during the sinusoidal light:dark cycle in *C. velia* were identical to HL grown *C. velia* (not shown).

### Variable fluorescence parameters

The maximal efficiency of PSII photochemistry,  $F_v/F_m$ , was  $0.61 (\pm 0.01)$  for LL grown *C. velia* (Table 3). By contrast, HL

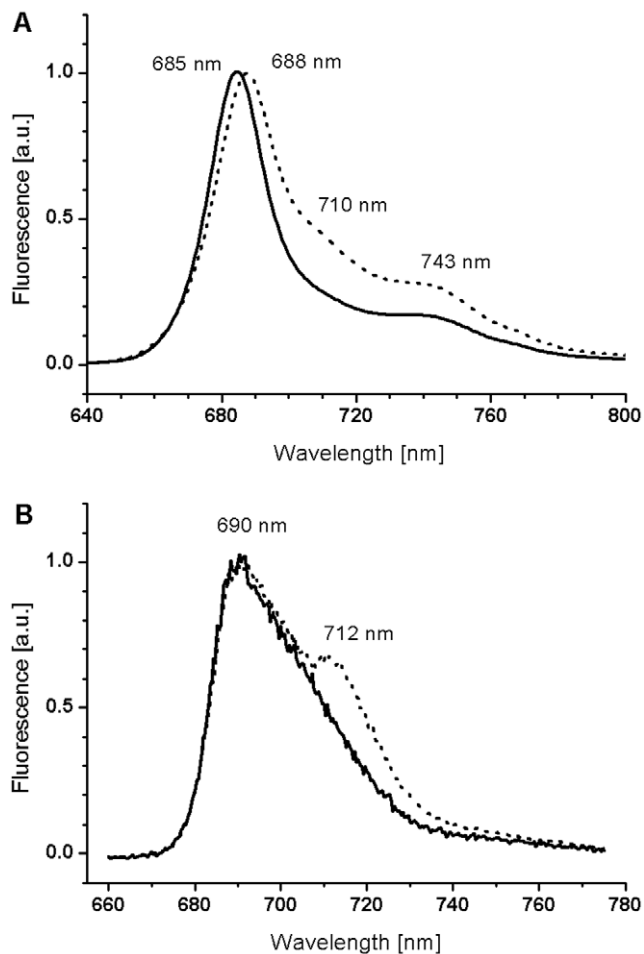

**Figure 2. Room temperature and 77K fluorescence emission spectra for *C. velia* grown under LL and HL.** Spectra were normalized at the chlorophyll a fluorescence emission maxima. Given the fluorescence spectra was identical for HL and sinusoidal light:dark cycle grown *C. velia*, we only show the results for the HL grown cells. doi:10.1371/journal.pone.0047036.g002

grown *C. velia* had an  $F_v/F_m$  ratio of  $0.52 (\pm 0.01)$  (Table 3) indicating a decrease in the maximal efficiency of PSII photochemistry. Similarly, during the sinusoidal cycle,  $F_v/F_m$  ratios declined from  $0.56 (\pm 0.01)$  at the beginning of the light period to  $0.51 (\pm 0.01)$  by the evening and then started to increase again after the light was turned-off (Fig. 3A).

The efficiency of PSII photochemistry in the light,  $\Phi_{PSII}$  (also known as the Genty parameter), was slightly greater when *C. velia* was grown at HL ( $0.14 \pm 0.01$ ) than at LL ( $0.11 \pm 0.02$ ) (Table 3). In *C. velia* cells grown under a sinusoidal light:dark cycle, the predawn value of  $\Phi_{PSII}$  was similar to LL grown cultures ( $0.11 \pm 0.01$ ), then increasing rapidly after onset of light and reaching the highest values before midday ( $0.28 \pm 0.01$ ). Subsequently  $\Phi_{PSII}$  started to decline towards the dark period to value of  $0.14 (\pm 0.01)$  (Fig. 3B).

qP reflects the number of open PSII reaction centers and denotes the proportion of excitation energy trapped by them – therefore the higher qP, the more efficient it is in utilization of incident light. We have found that HL relative to LL grown *C. velia* had higher qP values ( $0.54 \pm 0.02$  and  $0.34 \pm 0.04$  respectively) (Table 3). In the sinusoidal *C. velia* cultures, we observed a gradual increase in qP with increasing light intensity during light period (Fig. 3C). Average predawn qP values were  $0.41 (\pm 0.01)$ , while

those at noon were almost double ( $0.78 \pm 0.01$ ). qP started to decline already pre dusk to  $0.52 (\pm 0.03)$  after the onset of night, (Fig. 3C). All these results showed ramping up of the photosynthetic apparatus during mid-morning (qP increase, Fig. 3C) and the ability of *C. velia* to use most of the incident light for photosynthesis during maximal irradiance (no decay of qP at noon, Fig. 3C).

Given that NPQ is proportional to heat-dissipation of excitation energy in the antenna system in the dark acclimated state [see 25], or more simply, the amount of energy not used in photochemistry, changes in NPQ in the sinusoidal cultures reflect the cells dynamically responding to changes in irradiance for growth. NPQ was highest predawn ( $1.26 \pm 0.07$ ) and declined rapidly after onset of light to a minimum  $0.35 (\pm 0.03)$  before midday. From midday NPQ showed a continual increase (Fig. 3D) through to the dark period. NPQ was higher (in fact doubled) in HL grown *C. velia* ( $1.42 \pm 0.29$ ) than LL cultures ( $0.73 \pm 0.08$ ) (Table 3). These data show that *C. velia* can cope efficiently with increasing light intensity during diel cycle as NPQ values were minimal and relatively stable during the first half of light period (up to 15 h, see Fig. 3D), and the non-radiative energy dissipation was stimulated only afterwards.

### O<sub>2</sub> evolution, <sup>14</sup>C fixation and the Photosynthetic quotient

The ability of *C. velia* to efficiently acclimate photosynthesis to wide range of constant irradiance was reflected in the values of the gross rate of O<sub>2</sub> evolution. Ag was comparable for HL and LL *C. velia* when expressed on a per chl *a* basis (Table 4; Fig. 4A). This was also the case for <sup>14</sup>C fixation, found to be  $3.67 \pm 0.07$  and  $2.97 \pm 0.07$  mg C mg chl<sup>-1</sup> h<sup>-1</sup> for HL and LL *C. velia* respectively (Table 4; Fig. 4C).

We observed a pronounced ‘hysteresis effect’ in photosynthetic parameters of *C. velia* grown under the sinusoidal light:dark cycle. The hysteresis effect represents an asymmetric response of photosynthesis to the same irradiance in the morning versus the afternoon [38,39,40] and references therein. We observed maximum O<sub>2</sub> evolution rates before noon with reduced O<sub>2</sub> evolution in the afternoon at the same light intensity (Fig. 4A). In the same way, the maximum <sup>14</sup>C fixation rate was measured before noon was greater than that measured after (Fig. 4C). Thus, both dark and light photosynthetic reactions show the mid-morning maximum. However, while <sup>14</sup>C fixation rates gradually decreased after the mid-morning peak, O<sub>2</sub> evolution rates declined rapidly to ca. 60% at midday and then remained constant until late evening (Fig. 4A, C).

Changes in photosynthetic efficiency did not follow those for the maximum photosynthetic rate in the sinusoidal cultures (Fig. 4B);  $\alpha$  increased steadily throughout the day to ca.  $0.18 \pm 0.01$  mgC mg chl<sup>-1</sup> h<sup>-1</sup> ( $\mu\text{mole photons m}^{-2} \text{s}^{-1}$ )<sup>-1</sup> with a midday depression. In both HL and LL grown *C. velia*,  $\alpha$  values were similar to predawn values measured of the sinusoidal cycle (Fig. 4B), ( $0.06 \pm 0.00$  and  $0.09 \pm 0.01$  mgC mg chl<sup>-1</sup> h<sup>-1</sup> ( $\mu\text{mole photons m}^{-2} \text{s}^{-1}$ )<sup>-1</sup> respectively).

We found the saturation intensity for carbon fixation ( $E_k$ ) was higher, in fact doubled, in HL grown relative to LL grown *C. velia* ( $63 \pm 3$   $\mu\text{mole photons m}^{-2} \text{s}^{-1}$  and  $33 \pm 3$   $\mu\text{mole photons m}^{-2} \text{s}^{-1}$  respectively) (Table 4) but still below the growth irradiance for HL cultures. In sinusoidal cells of *C. velia*,  $E_k$  was much higher than in cultures growing under continuous light and followed the diel changes in irradiance, that is,  $E_k$  increased from the predawn value of  $82 \pm 5$   $\mu\text{mole photons m}^{-2} \text{s}^{-1}$  to  $129 \pm 9$   $\mu\text{mole photons m}^{-2} \text{s}^{-1}$  at midday and dropped back down to  $58 \pm 3$   $\mu\text{mole photons m}^{-2} \text{s}^{-1}$  after the period of light

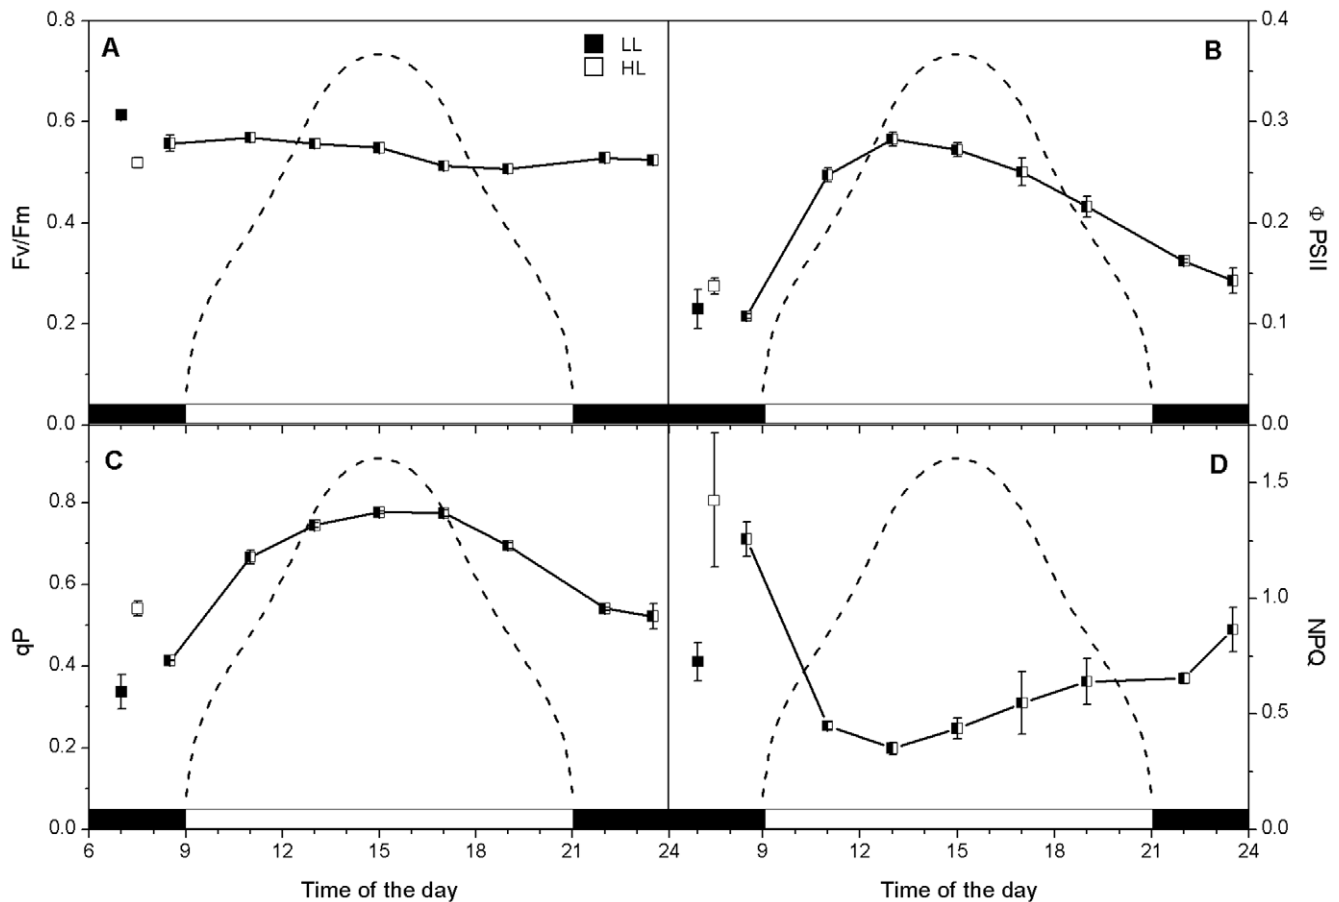

**Figure 3. Changes in *C. velia* major fluorescence parameters during a sinusoidal light:dark cycle.** Changes in the  $F_v/F_m$  (panel A),  $\Phi_{PSII}$  (panel B),  $qP$  (panel C) and NPQ (panel D) are shown. Error bars are calculated as standard deviations of  $n \geq 3$  replicated. Average values (plus error bars) measured for LL (■) and HL (□) grown *C. velia* are included for comparison. The dashed line shows the light intensity during the light part of the cycle, with a midday peak of  $500 \mu\text{mol photons m}^{-2} \text{s}^{-1}$ . doi:10.1371/journal.pone.0047036.g003

(not shown). This indicates that it is possible for *C. velia* to attain a high  $E_k$ , but not in the HL cells grown on continuous light.

The photosynthetic quotient (PQ) is defined by the molar ratio of the rate of oxygen production relative to carbon dioxide assimilated. We found the PQ ratio to be  $\sim 1.3$  when examining *C. velia* grown in continuous light, both in the HL and LL grown cultures (Table 4). *C. velia* cells growing on the sinusoidal light:dark

cycle modulated their photosynthetic quotient in response to the changing irradiance during the light period; with the midday minimum 0.76. While the photosynthetic quotient was still close to 1 an hour after dark, the predawn value was doubled ( $PQ \approx 2$ ) (Fig. 4D).

**Table 3. Summary of physiological responses measured using fluorescence techniques in *C. velia* grown under three different photon treatments.**

|                 | LL              | HL              | Sinusoidal light:dark cycle | Response in sinusoidal cultures |
|-----------------|-----------------|-----------------|-----------------------------|---------------------------------|
| $F_v/F_m$       | $0.61 \pm 0.01$ | $0.52 \pm 0.01$ | $0.54 \pm 0.02$             | Fig. 3A                         |
| $\Phi_{PSII}$   | $0.11 \pm 0.02$ | $0.14 \pm 0.01$ | $0.21 \pm 0.06$             | Fig. 3B                         |
| $qP$            | $0.34 \pm 0.04$ | $0.54 \pm 0.02$ | $0.64 \pm 0.13$             | Fig. 3C                         |
| NPQ             | $0.73 \pm 0.08$ | $1.42 \pm 0.29$ | $0.65 \pm 0.29$             | Fig. 3D                         |
| $1-qP$          | $0.66 \pm 0.04$ | $0.46 \pm 0.02$ | $0.36 \pm 0.13$             | Not shown                       |
| $\sigma_{PSII}$ | $307 \pm 8$     | $380 \pm 6$     | $444 \pm 8$                 | Not shown                       |
| $p$             | $0.37 \pm 0.01$ | $0.22 \pm 0.01$ | $0.26 \pm 0.04$             | Not shown                       |

(Note:  $p$  in this table refers to the connectivity factor).

doi:10.1371/journal.pone.0047036.t003



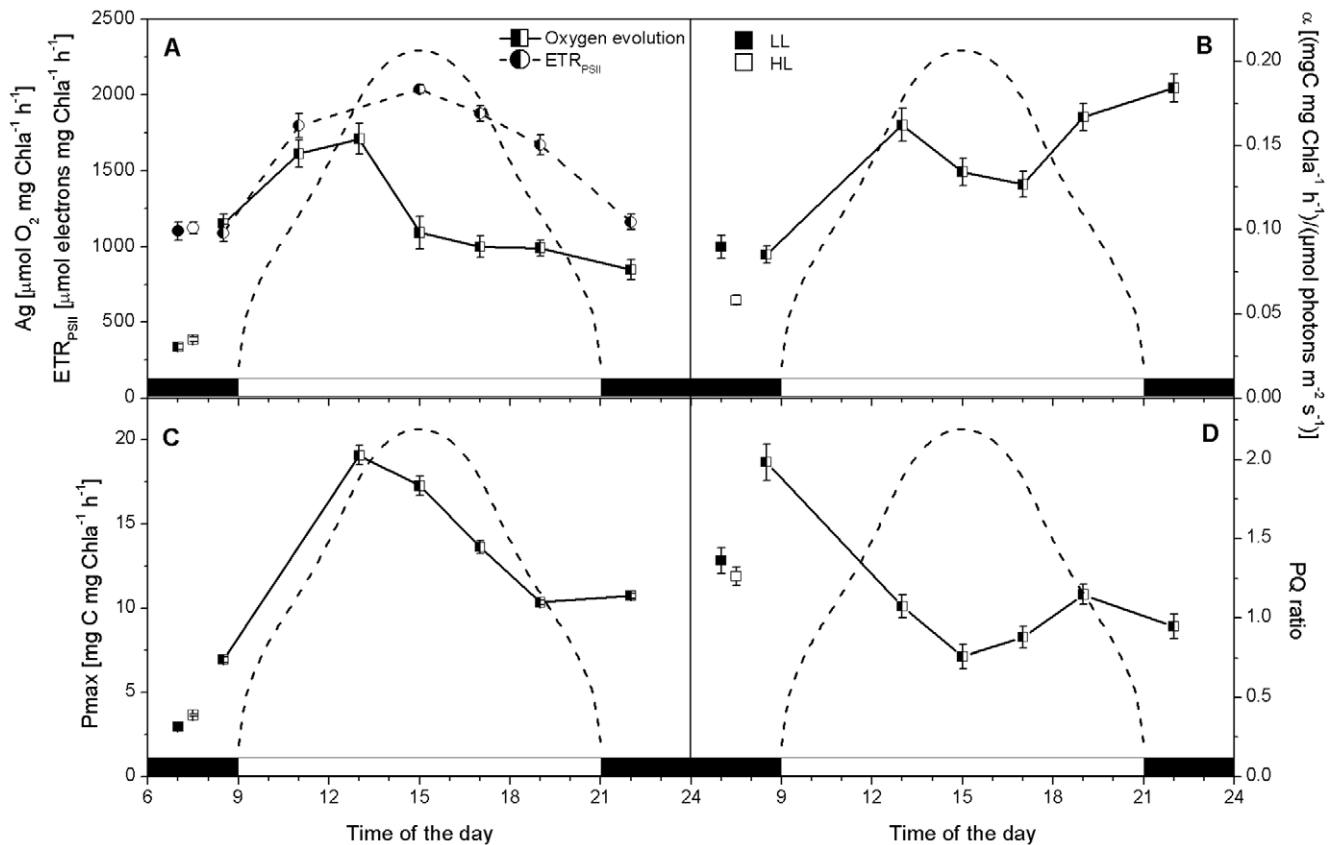

**Figure 4. Changes in *C. velia* light and dark reactions during a sinusoidal light:dark cycle.** Changes in O<sub>2</sub> evolution and ETR<sub>PSII</sub> (panel A), alpha (photosynthetic efficiency, panel B), C fixation rates (panel C) and the photosynthetic quotient (PQ, panel D) are shown. Error bars are calculated as standard deviations of  $n \geq 2$  replicated. Average values (plus error bars) measured for LL (■) and HL (□) grown *C. velia* are included for comparison. The dashed line shows the light intensity during the light part of the cycle, with a midday peak of 500  $\mu\text{mol photons m}^{-2} \text{s}^{-1}$ . doi:10.1371/journal.pone.0047036.g004

## Discussion

We have measured the photosynthetic activities and photoacclimation strategies of the coral associated alveolate alga *Chromera velia*, the closest photosynthetic relative to apicomplexan parasites and dinoflagellate algae [10,19]. The majority of reef building scleractinian corals contain endosymbiotic dinoflagellate algae (zooxanthellae) of the genus *Symbiodinium* [14,15,16,17]. The photosynthetic performance of zooxanthellae is affected by

environmental factors including ambient light (quantity and quality), temperature, CO<sub>2</sub>, and nutrient availability. The response to light is arguably the most important factor controlling productivity, physiology and ecology of corals [16,40,41,42,43,44,45]. Many studies have investigated photoacclimation strategies in scleractinian and other corals e.g., [14,15,16,17,43,44,45,46,47,48] but studies of the free-living zooxanthellae are less common e.g., [14,45,50]. Studies have shown that corals and their symbiotic algae may be vulnerable to

**Table 4.** Summary of physiological responses measured by oxygen evolution and <sup>14</sup>C fixation in *C. velia* grown under three different photon treatments.

|                                                                                                | LL          | HL          | Sinusoidal light:dark cycle | Response in sinusoidal cultures |
|------------------------------------------------------------------------------------------------|-------------|-------------|-----------------------------|---------------------------------|
| A <sub>g</sub> $\mu\text{mol O}_2 \text{ mg chl}^{-1} \text{ h}^{-1}$                          | 338 ± 19    | 386 ± 16    | 1200 ± 329                  | Fig. 4A                         |
| P <sub>max</sub> $\mu\text{molC mg chl}^{-1} \text{ h}^{-1}$                                   | 248 ± 5     | 306 ± 6     | 1084 ± 381                  | Not shown                       |
| P <sub>max</sub> $\text{mgC mg chl}^{-1} \text{ h}^{-1}$                                       | 2.97 ± 0.07 | 3.67 ± 0.07 | 13.0 ± 4.6                  | Fig. 4C                         |
| ETR <sub>PSII</sub> $\mu\text{mole electrons mg chl}^{-1} \text{ h}^{-1}$                      | 1102 ± 59   | 1120 ± 38   | 1605 ± 391                  | Fig. 4A                         |
| PQ                                                                                             | 1.36 ± 0.08 | 1.26 ± 0.06 | 1.13 ± 0.44                 | Fig. 4D                         |
| $\alpha$ $\text{mgC mg chl}^{-1} \text{ s}^{-1} / \mu\text{mol photons m}^{-2} \text{ s}^{-1}$ | 0.09 ± 0.01 | 0.06 ± 0.00 | 0.14 ± 0.04                 | Fig. 4B                         |
| E <sub>k</sub> $\mu\text{mol photons m}^{-2} \text{ s}^{-1}$                                   | 33 ± 3      | 63 ± 3      | 90 ± 33                     | Not shown                       |

doi:10.1371/journal.pone.0047036.t004



very high irradiances, expressed in the natural environment as a localized solar bleaching response (e.g., reduction in numbers of symbiotic dinoflagellates, loss of photosynthetic pigments, photoinhibition of photosynthesis, or a combination of these) [45,48,49,51,52].

### LL and HL acclimation strategies

To understand the basic physiological behavior and acclimation strategies we cultivated *C. velia* at continuous irradiance under two extreme light intensities: low ( $15 \mu\text{mol m}^{-2} \text{s}^{-1}$ ) and high ( $200 \mu\text{mol m}^{-2} \text{s}^{-1}$ ). LL *C. velia* had greater C, N and chl *a* quotas, higher  $F_v/F_m$  in comparison to HL grown cells which in turn had more photoprotective carotenoids. The LL grown *C. velia* accumulated both C and N reserves and increased their light harvesting potential (package effect aside) relative to those grown at HL (Table 2). The acclimation to LL conditions also required substantial antennae reorganization, as indicated by appearance of an extra emission band (710 nm at RT, 712 nm at 77 K; see Fig. 2). Moreover, PSII reaction centers of LL grown *C. velia* are probably better interconnected as deduced from the 78% higher value of the connectivity parameter compared to HL grown cells (Table 3). On the other hand, there is probably also a redistribution of some PSII antennae towards PSI in LL grown cells. This is also observed in the reduction of chl *a* specific absorption of PSII by 29% ( $\alpha^*_{\text{PSII}}$ ; see Table 2) as well as the functional absorption cross section of PSII by 19% ( $\sigma_{\text{PSII}}$ ; see Table 3) in spite of the three times higher chl *a* concentrations. We suggest that the PSI abundance increases PSI activity that could be used for optimization of photosynthesis under light limited conditions.

The acclimation to HL conditions considerably decreased the chl content and increased carotenoid:Chl *a* ratio (Table 2). It was recently shown that both major carotenoids, isofucoanthin as well as violaxanthin, contribute to light-harvesting in *C. velia* [25]. The increase in pigment content was much more pronounced for violaxanthin (35%) than for isofucoanthin (24%); this is related to their photoprotective roles [25]. Violaxanthin in *C. velia* undergoes very fast de-epoxidation to zeaxanthin under the excessive irradiance that enables efficient photoprotection by NPQ [25]. In line with that, HL grown cells, containing appreciably more violaxanthin had NPQ values twice those measured in LL cells (Table 3). The NPQ reflects non-photochemical energy dissipation and reduces the excitation pressure over PSII in HL grown *C. velia* (see 1-qP lower by 30% in comparison with LL in Table 3). This reveals the ability of *C. velia* to protect itself under high-light growth conditions ( $200 \mu\text{mol m}^{-2} \text{s}^{-1}$ ). As a result, in spite of the reduction of photosynthetic efficiencies (see the lower of  $F_v/F_m$  and  $\alpha$  in Tables 3 and 4), *C. velia* can maintain the rates of photosynthesis for both, light ( $\text{O}_2$  evolution,  $A_g$ ) and dark (C fixation,  $P_{\text{max}}$ ) reactions during growth under HL conditions (see Table 4).

Growth rates, C:N ratios, Chl *a* and photosynthetic rates for *C. velia* are similar to those reported for *Symbiodinium* spp. e.g. [14,45,47] and other eukaryotic algae grown under continuous light e.g. [38,53]. The low values of  $\Phi_{\text{PSII}}$  measured in *C. velia* are similar to those measured in coral residing in the shallowest habitats [54]. This is usually interpreted as suggesting low efficiency of PSII but that cannot be the case in *C. velia* as we measured comparatively high rates of oxygen evolution. Alternatively, it can indicate redistribution (spillover) of excitation between PSII and PSI. Other experimental data (fluorescence recovery after photobleaching, R.Kaňa, unpublished) also suggest high mobility of *C. velia* antennae and thus support the spillover hypothesis. In the case of spillover the  $F_m$  fluorescence of PSII

could be lowered by non-fluorescent PSI. Such limitation of excitation energy transfer to PSII at high irradiances allows *C. velia* to limit photodamage to the D1 protein in PSII. It seems that *C. velia* possess a unique organization of the antennae system where absorbed light is distributed among both photosystems to increase their efficiency.

### Photosynthesis under sinusoidal light:dark cycle

The efficient photosynthesis in *C. velia* was further stimulated under sinusoidal light:dark cycle that better simulates physiological conditions in nature. In this case, we measured very high rates of  $\text{O}_2$  evolution (up to  $1708 \mu\text{mol O}_2 \text{ mg chl}^{-1} \text{ h}^{-1}$ ) and  $^{14}\text{C}$  fixation (up to  $19 \text{ mg C mg chl}^{-1} \text{ h}^{-1}$ ) during the light phase of the sinusoidal light:dark cycle, some 4–5 times higher than those measured in cultures receiving continuous light. In addition, the sinusoidal light regime allowed greater flexibility and dynamics of the photosynthesis apparatus with more than 60% of NPQ (depending the time of day) recovered within 3 minutes of sampling, while only 40% recovered in cultures grown under continuous irradiance (data not shown). Hence, the diel periodicity in irradiance during the growth cycle is crucial to obtaining maximal photosynthetic rates ( $P_{\text{max}}$ ,  $A_g$ ) and consistent with the need of *C. velia* to maintain energetic balance within the primary photosynthetic reactions.

We also found that while the actual PSII photochemistry in the light ( $\Phi_{\text{PSII}}$ , Fig. 3B) tracked changes in  $^{14}\text{C}$  fixation and  $\text{O}_2$  evolution rates (mid-morning maximum and afternoon depression, see Fig. 4A, C), the maximal quantum yield of PSII ( $F_v/F_m$ ) and qP were maintained until the late afternoon (Fig. 3A, C). This afternoon difference between the maximal capacity of PSII photochemistry (represented by  $F_v/F_m$ , Fig. 3A) together with qP (Fig. 3C) and actual efficiency of PSII in light ( $\Phi_{\text{PSII}}$ , Fig. 3B) correlated with gradual increase of NPQ during the afternoon (Fig. 3D). Stimulation of NPQ (Fig. 3D) could be the consequence of slower  $\text{CO}_2$  assimilation during the afternoon (Fig. 4C) resulting in slower ATP regeneration that would cause higher lumen acidification [55], a main stimulus of NPQ increase in *C. velia* [25]. Our results therefore suggest that optimization of light reactions during day period proceeds on the level of regulation of light-harvesting antennae (by NPQ, see Fig. 3 D), rather than through photoinhibitory destruction of core proteins of PSII. Further support for this comes from the lack of a significant mid-day depression in  $F_v/F_m$ , a sign of photoinhibition [56,57]. Also, the excitation pressure over PSII (1-qP) during the highest irradiances was minimal (around 0.22); this excludes an overexcitation of PSII and therefore photoinhibition.

Hysteresis effects were observed during the sinusoidal light cycle when examining  $\text{O}_2$  evolution rates and  $^{14}\text{C}$  fixation rates (Fig. 4A, C). Indeed, *C. velia* appeared to be taking an ‘afternoon nap’. What we found interesting is that the afternoon depression varied between the light and dark reactions of photosynthesis. While  $^{14}\text{C}$  fixation rates were gradually decreasing after the mid-morning peak (Fig. 4C),  $\text{O}_2$  evolution rates declined rapidly to ca. 60% at midday and then remained constant until evening (Fig. 4A). Given the culture conditions, the hysteresis we observed were not related to changes in nutrient and  $\text{CO}_2$  availability. Additional support for this comes from the C and N quotas which were not that different from Redfield (Fig. 1) and pH values which were close to 8.2 (not shown) throughout the sinusoidal light:dark cycle. The decoupling between  $\text{O}_2$  evolution and  $^{14}\text{C}$  fixation rates during the midday and early afternoon maybe related to changes in photorespiration, the process whereby phototrophs fix  $\text{O}_2$  and liberate  $\text{CO}_2$  [58]. Photorespiration has been previously reported in zooxanthellae [see 16,59], but rates were generally found to be

low, presumably because the type II RuBisCO was found exclusively in the pyrenoid [60] thus limiting exposure to O<sub>2</sub> and/or due to the presence of a carbon concentrating mechanism [61].

Burris [62] reported that photosynthetic quotients could be even as low as 0.1 when photorespiration is the dominant process while little or no photorespiration takes place when PQ<sub>s</sub> are > than 1. As we measured PQ's of 0.76 at midday (Fig. 4D), we suggest the presence of photorespiration in *C. velia*, but only with rather low rates, similarly as was observed for zooxanthellae. This would imply that *C. velia* switches from primarily production of glycolate and its excretion (the greater the glycolate, the lower the quotient) during the day to glycerol synthesis at night (PQ<sub>s</sub>≈2, see Fig. 4D) [57]. The presence of photorespiration in *C. velia* suggests that it has a similar lifestyle to symbiotic dinoflagellates. The released carbon compounds (referred to as 'junk food' by Falkowski et al. [41]) are used by the coral for respiratory energy generation via the synthesis of energy-rich storage products such as lipids and starch [16,41]. The high carbon fixation rates in *C. velia* may be associated with supplying carbon to this cycle.

Photorespiration is thought to be an evolutionary relic as primitive photosynthesis originated from the early atmosphere with very little oxygen and thus the early RuBisCO lacked discrimination between O<sub>2</sub> and CO<sub>2</sub> [58]. *C. velia* possess the primitive form of RuBisCO (type II) homologous to that of dinoflagellates that was acquired during evolution by the horizontal gene transfer from a proteobacterium [19]. The type II RuBisCO comprises only large subunits, has a high K<sub>c</sub> but has a poor affinity for CO<sub>2</sub> and discriminates CO<sub>2</sub> from O<sub>2</sub> less well than type I RuBisCO [58,61,63,64]. We suggest that type II RuBisCO could be a reason for such a high <sup>14</sup>C fixation rates observed in *C. velia*. However, type II RuBisCO is very sensitive to presence of O<sub>2</sub> that could be used for its oxygenase activity and thus reduce carboxylation activity. Therefore, there must be a mechanism to reduce O<sub>2</sub> accessibility to RuBisCO. One of the most known mechanisms that operates to suppress the oxygenase activity of RuBisCO is the carbon-concentrating mechanism (CCM) that accumulates C<sub>i</sub> and elevates [CO<sub>2</sub>] around RuBisCO. *Symbiodinium* spp. fix inorganic carbon efficiently because they use CCMs [59,61]. Nonetheless, even in zooxanthellae, CCM activity has not been found to be as high as might be expected [61]. Another possibility is the presence of special organelles (pyrenoids) that elevate [CO<sub>2</sub>] within chloroplasts. Pyrenoids are often present in dinoflagellates [65]; their formation appears to be correlated with CO<sub>2</sub> fixation rates in *Gonyaulax* sp. [60] which also utilizes type II RuBisCO. Currently, we lack direct evidence of CCMs and pyrenoids in *C. velia* but given the very high carbon fixation rates parallel the highest O<sub>2</sub> evolution rates mid-morning, it appears that *C. velia* is somehow able to build a sufficient carbon pool around RuBisCO so that it functions predominately as a carboxylase.

An alternative possibility explaining high carbon fixation rates in high oxygen concentrations could be the occurrence of some alternative, oxygen consuming, electron flow, e.g. Mehler reaction or chlororespiration. During the Mehler reaction, the O<sub>2</sub> produced by PSII is reduced again by PSI thereby decreasing its concentration [66]. Chlororespiration is defined as a respiratory-like electron transport activity from NAD(P)H to O<sub>2</sub>, catalysed by NADH dehydrogenase and the plastid-localized terminal oxidase (PTOX) enzyme [58,67]. Even though PTOX has not yet been found in dinoflagellates nor their closest relatives (ciliates, perkinsea and apicomplexa; see Peltier et al. [68]), constitutive chlororespiration has already been proposed for a HL acclimated clade A *Symbiodinium* [69]. These alternative electron sinks would

not only reduce the O<sub>2</sub> concentrations in chloroplast, but also generate large trans-thylakoid ΔpH, provide the extra ATP and enhance photoprotection by NPQ see [70] for review. We did observe an uncoupling of ETR<sub>PSII</sub> from the rate of gross oxygen production by PSII from the midday until late afternoon (see Fig. 4A) suggesting the presence of some alternative electron flow to oxygen. Moreover, we have observed a temporary fast post-illumination decrease in O<sub>2</sub> concentration (Fig. 5) at the time of maximal oxygen evolution that may play a role in oxygen consumption. Interestingly, this respiration occurs only for sinusoidal grown cells with maximal rate of CO<sub>2</sub> fixation and was absent in HL and LL grown cells. We hypothesize that the observed respiration may represent a mechanism by which the O<sub>2</sub> concentration is reduced and thus the oxygenase activity of RuBisCO type II is minimized so that RuBisCO is turned towards higher carboxylation. This oxygen consuming process could play the role of an "optimizer" reducing O<sub>2</sub> concentrations at RuBisCO. To resolve the origin of this respiration, more experiments are necessary that will also show if it proceeds in the whole thylakoid or if it is present only in some parts of membrane, where RuBisCO is located.

## Conclusions

*C. velia* is effectively a mixture of different organisms: heme synthesis as observed in Apicomplexans, simple pigmentation as in Eustigmatophyceae, primitive type II RuBisCO as in Dinoflagellates, and antenna organized as observed in Bacillariophyceae (diatoms). We have shown for the first time that this simple photosynthetic system is surprisingly efficient in photosynthetic carbon assimilation. Uniquely to *C. velia*, we propose that members of this new family of Chromeraeae use photorespiration, together with the thermal energy dissipation via NPQ, as a mechanism in their photoacclimation strategy. We propose that future studies examine the role of photorespiration in this apicomplexan. Rather than considering it a wasteful processes (compared to photosynthesis due to its high consumption of NADPH and ATP), it should

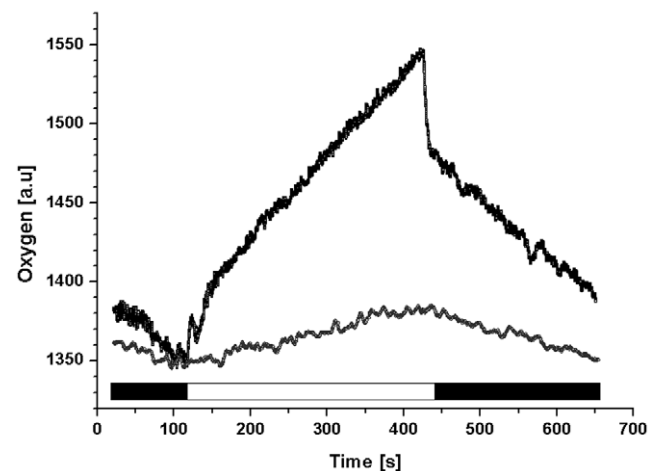

**Figure 5. Respiratory and photosynthetic activities of *C. velia*.** Representative data of low (grown under HL conditions; grey line) and high (mid-morning maximum under sinusoidal light:dark cycle; black line) photosynthetic rates are shown. Oxygen concentration was continuously monitored using Clark-type electrode in the dark (black banner) or in the light (white banner). For better comparison, curves were artificially shifted to the same initial value at the time 115 s. Data were normalized to chl *a* concentration of samples. doi:10.1371/journal.pone.0047036.g005

be considered as mechanism for energy dissipation as well as producer of additional glycolate to its host. If photorespiration is acting in photoprotection, then corals which harbor *C. velia* (and symbiotic dinoflagellates such as *Symbiodinium*) may benefit from this particular symbiont(s).

## Acknowledgments

We thank the scientists, staff and students at the Institute of Microbiology Třeboň, Czech Republic for their support during this study. We thank the associate editor and review process for improving the manuscript.

## References

- Quigg A, Finkel ZV, Irwin AJ, Reinfelder JR, Rosenthal Y, et al. (2003) The evolutionary inheritance of elemental stoichiometry in marine phytoplankton. *Nature* 425: 291–294.
- Quigg A, Irwin AJ, Finkel ZV (2011) Evolutionary imprint of endosymbiosis of elemental stoichiometry: testing inheritance hypotheses. *Proc R Soc Lond: B* 278: 526–534.
- Falkowski PG, Katz ME, Knoll AH, Quigg A, Raven JA, et al. (2004) The evolution of modern eukaryotic phytoplankton. *Science* 305: 354–360.
- McFadden GI, Waller RE, Reith ME, Langumusch N (1997) Plastids in apicomplexan parasites. *Plant System Evol* 11:261–287.
- Ralph SA, van Dooren GG, Waller RF, Crawford MJ, Fraunholz MJ, et al. (2004) Tropical infectious diseases: metabolic maps and functions of the *Plasmodium falciparum* apicoplast. *Nat Rev Microbiol* 2: 203–216.
- Obornik M, Modrý D, Lukeš M, Černotíková-Stříbrná E, Cihlář J, et al. (2012) Morphology, ultrastructure and life cycle of *Vitrella brassicaformis* n. sp., n. gen., a novel chromerid from the Great Barrier Reef. *Protist* 163: 306–323
- Cavalier-Smith T (1999) Principles of protein and lipid targeting in secondary symbiogenesis: Euglenoid, dinoflagellate, and sporozoan plastid origins and the eukaryote family tree. *J Eukaryot Microbiol* 46:347–366.
- Cavalier-Smith T (2004) Chromalveolate diversity and cell megaevolution: interplay of membranes, genomes and cytoskeleton. In: Hirt RP, Horner D, editors. *Organelles, genomes and eukaryotic evolution*. Taylor and Francis, London. pp. 71–103.
- Keeling PJ (2009) Chromalveolates and the evolution of plastids by secondary endosymbiosis. *J Eukaryot Microbiol* 56: 1–8.
- Moore RB, Obornik M, Janouškovec J, Chrudimský T, Vancová M, et al. (2008) A photosynthetic alveolate closely related to apicomplexan parasites. *Nature* 451: 959–963.
- Zhang Z, Green BR, Cavalier-Smith T (2000) Phylogeny of ultra-rapidly evolving dinoflagellate chloroplast genes: A possible common origin for sporozoan and dinoflagellate plastids. *J Mol Evol* 51: 26–40.
- Fast NM, Kissinger JC, Roos DS, Keeling PJ (2001) Nuclear-encoded, plastid targeted genes suggest a single common origin for apicomplexan and dinoflagellate plastids. *Mol Biol Evol* 18: 418–426.
- Kořený L, Sobotka R, Janouškovec J, Keeling PJ, Obornik M (2011) Tetrapyrrole synthesis of photosynthetic chromerids is likely homologous to the unusual pathway of apicomplexan parasites. *Plant Cell* 23: 3454–3462.
- Chang SS, Prézelin BB, Trench RK (1983) Mechanisms of photoadaptation in three strains of the symbiotic dinoflagellate *Symbiodinium microadriaticum*. *Mar Biol* 76: 219–229.
- Muscantine L, Falkowski PG, Porter JW, Dubinsky Z (1984) Fate of photosynthetic fixed carbon in light-adapted and shade-adapted colonies of the symbiotic coral *Stylophora pistillata*. *Proc R Soc Lond B* 222:181–202.
- Yellowlees D, Warner M (2003) Photosynthesis in symbiotic algae. In: Larkum AWD, Douglas SE, Raven JA, editors. *Photosynthesis in Algae*. Advances in Photosynthesis and Respiration. Springer. pp. 437–455.
- Sheppard CRC, Davy SK, Pilling GM (2009) *The Biology of Coral Reefs*. The Biology of Habitats Series, Oxford University Press. 352 p.
- Obornik M, Janouškovec J, Chrudimský T, Lukeš J (2009) Evolution of the apicoplast and its hosts: From heterotrophy to autotrophy and back again. *Int J Parasitol* 39: 1–12.
- Janouškovec J, Horák A, Obornik M, Lukeš J, Keeling PJ (2010) A common red algal origin of the apicomplexan, dinoflagellate, and heterokont plastids. *Proc Natl Acad Sci U.S.A.* 107: 10949–10954.
- Okamoto N, McFadden GI (2008) The mother of all parasites. *Future Microbiol* 3: 391–395.
- Obornik M, Vancová M, Lai DH, Janouškovec J, Keeling PJ, et al. (2011) Morphology and ultrastructure of multiple life cycle stages of the photosynthetic relative of apicomplexa, *Chromera velia*. *Protist* 162:115–130.
- Weatherby K, Murray S, Carter DJ, Šlapeta J (2011) Surface and flagella morphology of the motile form of *Chromera velia* revealed by field-emission scanning electron microscopy. *Protist* 162: 142–153.
- Sutak R, Šlapeta J, San Roman M, Camadro J-M, Lesuisse E (2010) Nonreductive iron uptake mechanism in the marine alveolate *Chromera velia*. *Plant Physiol* 154: 991–1000.
- Guo JT, Weatherby K, Carter D, Šlapeta J (2010) Effect of nutrient concentration and salinity on immotile–motile transformation of *Chromera velia*. *J Eukaryot Microbiol* 57: 444–446.
- Kotabová E, Kaňa R, Jarešová J, Prášil O (2011) Non-photochemical fluorescence quenching in *Chromera velia* is enabled by fast violaxanthin de-epoxidation. *Febs Letters* 585: 1941–1945.
- Pan H, Šlapeta J, Carter D, Chen M (2012) Phylogenetic analysis of the light-harvesting system in *Chromera velia*. *Photosyn Res* 111: 19–28.
- Botté CY, Yamaryo-Botté Y, Janouškovec J, Rupasinghe T, Keeling PJ, et al. (2011) Identification of plant-like galactolipids in *Chromera velia*, a photosynthetic relative of malaria parasites. *J Biol Chem* 286: 29893–29903.
- Leblond JD, Dodson J, Khadka M, Holder S, Scipelt RL (2012) Sterol Composition and Biosynthetic Genes of the Recently Discovered Photosynthetic Alveolate, *Chromera velia* (Chromerida), a Close Relative of Apicomplexans. *J. Eukaryot. Microbiol.*, 0(0), pp. 1–7, DOI: 10.1111/j.1550-7408.2012.00611.x
- Havelková-Doušová H, Prášil O, Behrenfeld MJ (2004) Photoacclimation of *Dunaliella tertiolecta* (Chlorophyceae) under fluctuating irradiance. *Photosynthetica* 42: 273–281.
- Jeffrey SW, Vesik M (1997) Introduction to marine phytoplankton and their pigment signatures. In: Jeffrey SW, Mantoura RFC, Wright SW, editors. *Phytoplankton pigments in oceanography*. Paris: UNESCO Publishing. pp 37–84.
- Porra RJ, Thompson WA, Kriedemann PE (1989) determination of accurate extinction coefficients and simultaneous equations for assaying chlorophylls a and b extracted with four different solvents: Verification of the concentration of chlorophyll standards by atomic absorption spectrometry. *Biochim Biophys Acta* 975: 384–394.
- Kaňa R, Kotabová E, Komárek O, Papageorgiou GC, Govindjee, et al. (2012a) Slow S to M fluorescence rise in cyanobacteria is due to a state 2 to state 1 transition. *Biochim Biophys Acta*, in press.
- Kolber ZS, Prasil O, Falkowski PG (1998) Measurements of variable chlorophyll fluorescence using fast repetition rate techniques: defining methodology and experimental protocols. *Biochim Biophys Acta* 1367: 88–106.
- Suggett DJ, Moore CM, Geider RJ (2010) Estimating Aquatic Productivity from Active Fluorescence Measurement. In: Suggett DJ, Prasil O, Borowitzka M.A., editors. *Chlorophyll a Fluorescence in Aquatic Sciences: Methods and Applications*. Springer, Dordrecht, pp 103–127.
- Lewis MR, Smith JC (1983) A small volume, short-incubation-time method for measurement of photosynthesis as a function of incident irradiance. *Mar Ecol Prog Ser* 13:99–102.
- Butler NB (1982) Carbon dioxide equilibria and their applications. New York: Addison-Wesley Publishing Company Inc. 259 p.
- Jassby AD, Platt T (1976) Mathematical formulation of the relationship between photosynthesis and light for phytoplankton. *Limnol Oceanogr* 21: 540–547.
- Falkowski PG, Dubinsky Z, Wyman K (1985a) Growth-irradiance relationships in phytoplankton. *Limnol Oceanogr* 30: 311–321.
- Falkowski PG, Dubinsky Z, Santostefano G (1985b) Light-enhanced dark respiration in phytoplankton. *Verh Internat Verein Limnol* 22: 2830–2833.
- Levy O, Dubinsky Z, Schneider K, Achitov Y, Zakai D, et al. (2004) Diurnal hysteresis in coral photosynthesis. *Mar Ecol Prog Ser* 268: 105–117.
- Falkowski PG, Dubinsky Z, Muscatine L, Porter JW (1984) Light and bioenergetics of symbiotic coral. *BioScience* 34: 705–709.
- Porter JW, Muscatine L, Dubinsky Z, Falkowski PG (1984) Primary production and photoadaptation in light-adapted and shade-adapted colonies of the symbiotic coral, *Stylophora pistillata*. *Proc R Soc Lond B* 222: 161–180.
- Gorbanov MY, Falkowski PG, Kolber ZS (2000) Measurement of photosynthetic parameters in benthic organisms in situ using a SCUBA-based fast repetition rate fluorometer. *Limnol Oceanogr* 45:242–245.
- Gorbanov MY, Kolber ZS, Lesser MP, Falkowski PG (2001) Photosynthesis and photoprotection in symbiotic corals. *Limnol Oceanogr* 46:75–85.
- Hennige SJ, Suggett DJ, Warner ME, McDougall KE, Smith DJ (2009) Photobiology of *Symbiodinium* revisited: bio-physical and bio-optical signatures. *Coral Reefs* 28: 179–195.
- Hoegh-Guldberg O, Jones R (1999) Photoinhibition and photoprotection in symbiotic dinoflagellates from reef-building corals. *Mar Ecol Prog Ser* 183:73–86.

## Author Contributions

Conceived and designed the experiments: AQ EK OP. Performed the experiments: AQ EK JJ RK JŠ BŠ OK OP. Analyzed the data: AQ EK RK OP. Contributed reagents/materials/analysis tools: AQ EK JJ RK JŠ BŠ OK OP. Wrote the paper: AQ EK OP.

47. Jones RJ, Hoegh-Guldberg O (2001) Diurnal changes in the photochemical efficiency of the symbiotic dinoflagellates (Dinophyceae) of corals: photoprotection, photoinactivation and the relationship to coral bleaching. *Plant Cell Environ* 24: 89–99.
48. Ralph PJ, Gademann R, Larkum AWD, Kahl M (2002) Spatial heterogeneity in active chlorophyll fluorescence and PSII activity of coral tissues. *Mar Biol* 141: 639–646.
49. Ragni M, Airs RL, Hennige SJ, Suggett DJ, Warner ME, et al. (2010) PSII photoinhibition and photorepair of *Symbiodinium* (Pyrrophyta) differs between thermally tolerant and sensitive phlotypes. *Mar Ecol Prog Ser* 406: 57–70.
50. Suggett DJ, Warner M, Smith DJ, Davey P, Hennige S, et al. (2008) Photosynthesis and production of hydrogen peroxide by symbiotic dinoflagellates during short-term heat stress. *J Phycol* 44: 948–956.
51. Iglesias-Prieto R, Beltran V, La Jeunesse T, Reyes-Bonilla H, Thome P (2004) Different algal symbionts explain the vertical distribution of dominant reef corals in the eastern Pacific. *Proc R Soc Lond B* 271: 1757–1763.
52. Hoegh-Guldberg O, Mumby PJ, Hooten AJ (2007) Coral reefs under rapid climate change and ocean acidification. *Science* 318: 739–742.
53. Quigg A, Beardall J (2003) Protein turnover in relation to maintenance metabolism at low photon flux in two marine microalgae. *Plant, Cell Environ* 26: 1–10.
54. Warner ME, Lesser MP, Ralph PJ (2010) Chlorophyll fluorescence in reef building corals. In: Suggett DJ, Prášil O, Borowitzka M, editors. *Chlorophyll Fluorescence in Aquatic Sciences: Methods and Applications*. Springer. pp. 209–222.
55. Kaňa R, Kotabová E, Sobotka R, Prášil O (2012b) Non-photochemical quenching in cryptophyte alga *Rhodomonas salina* is located in chlorophyll *a/c* antennae. *PLoS One*. 7: e29700.
56. Prášil O, Adir N, Ohad I (1992) Dynamics of Photosystem II: mechanism of photoinhibition and recovery processes. In: Barber J, editor. *The Photosystems: Structure, Function and Molecular Biology*. Elsevier Science, Oxford. pp. 295–348.
57. Kaňa R, Lazar D, Prášil O, Naus J (2002) Experimental and theoretical studies on the excess capacity of Photosystem II. *Photosyn Res* 72: 271–284.
58. Beardall J, Quigg A, Raven JA (2003) Oxygen consumption: Photorespiration and chlororespiration. In: Larkum AWD, Douglas SE, Raven JA, editors. *Photosynthesis in Algae*. *Advances in Photosynthesis and Respiration*. Springer. pp. 157–181.
59. Crawley A, Kline DI, Dunn S, Anthony K, Dove S (2010) The effect of ocean acidification on symbiont photorespiration and productivity in *Acropora formosa*. *Global Change Biol* 16: 851–863.
60. Nassoury N, Fritz L, Morse D (2001) Circadian changes in ribulose-1,5-bisphosphate carboxylase/oxygenase distribution inside individual chloroplasts can account for the rhythm in dinoflagellate carbonfixation. *Plant Cell* 13: 923–934.
61. Leggat W, Badger M, Yellowlees D (1999) Evidence for an inorganic carbon-concentrating mechanism in the symbiotic dinoflagellate *Symbiodinium* sp. *Plant Physiol* 121: 1247–1255.
62. Burris JE (1981) Effects of oxygen and inorganic carbon concentrations on the photosynthetic quotients of marine algae. *Mar Biol* 65: 215–219.
63. Whitney SM, Andrews TJ (1998) The CO<sub>2</sub>/O<sub>2</sub> specificity of single-subunit ribulose-bisphosphate carboxylase from the dinoflagellate, *Amphidinium carterae*. *Aus J Plant Physiol* 25: 131–138.
64. Badger MR, Bek EJ (2008) Multiple Rubisco forms in proteobacteria: their functional significance in relation to CO<sub>2</sub> acquisition by the CBB cycle. *J Exp Bot* 59: 1525–1541.
65. Schnepf E, Elbrachter M (1999) Dinophyte chloroplasts and phylogeny - A review. *GRANA* 38: 81–97.
66. Mehler AH (1957) Studies on reactions of illuminated chloroplasts, I: Mechanism of the reduction of oxygen and other Hill reagents. *Arch BiochemBiophys* 33: 65–77.
67. Peltier G, Cournac L (2002) Chlororespiration. *Ann Rev Plant Physiol Plant Mol Biol* 53: 523–550.
68. Peltier G, Tolleter D, Billon E, Cournac L (2010) Auxiliary electron transport pathways in chloroplasts of microalgae. *Photosyn Res* 106: 19–31.
69. Reynolds JM, Bruns BU, Fitt WK, Schmidt GW (2008) Enhanced photoprotection pathways in symbiotic dinoflagellates of shallow-water corals and other cnidarians. *Proc Natl Acad Sci U.S.A.* 105: 13674–13678.
70. Cardol P, Forti G, Finazzi G (2011) Regulation of electron transport in microalgae. *Biochim Biophys Acta*, 1807: 912–918.
